# Supplementary material
Source: publisher figshare collection journal article supplement (https://acs.figshare.com/ndownloader/files/26588155)
Supplement: Supplementary file 1 [file 26588155]

# Supporting Information

## A Possible Mechanism of Ion Selectivity in Eukaryotic Voltage-Gated Sodium Channels

Boris S. Zhorov<sup>1,2,3</sup>

<sup>1</sup>Department of Biochemistry and Biomedical Sciences, McMaster University, Hamilton, Ontario, Canada

<sup>2</sup> Sechenov Institute of Evolutionary Physiology and Biochemistry, Russian Academy of Sciences, St. Petersburg 194223, Russian Federation

<sup>3</sup>Almazov National Medical Research Centre, St. Petersburg, 197341, Russian Federation

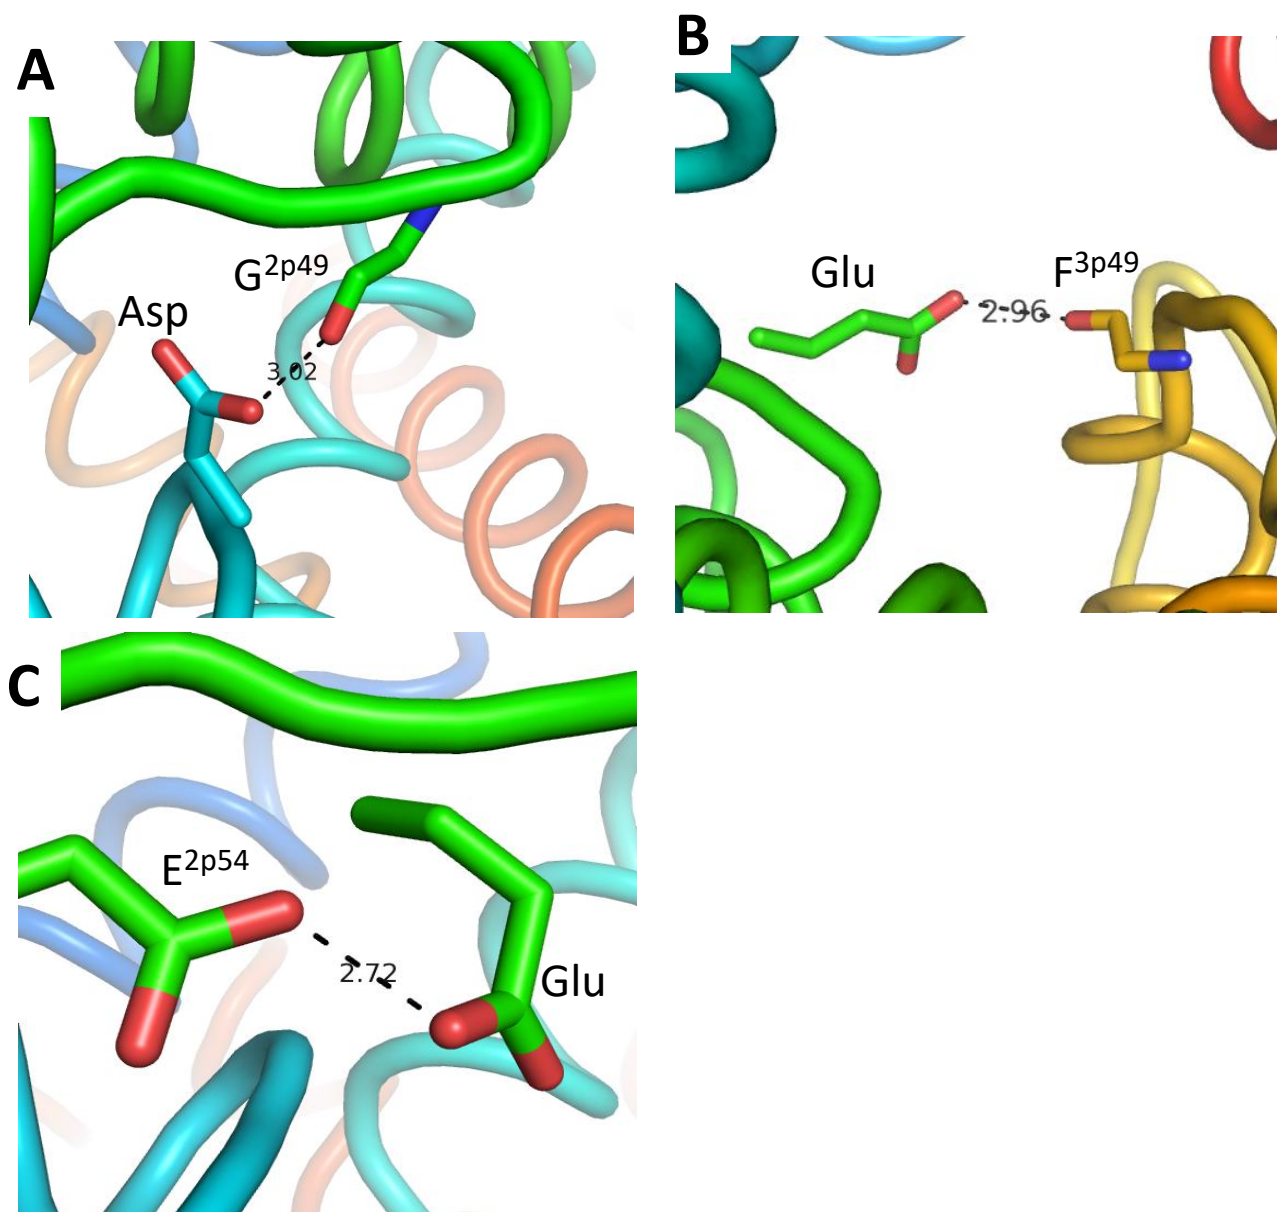

### Figure S1. Cryo-EM structures of Nav channels suggest protonation of acidic residues. **A.**

In the cryo-EM structure of NavPaS with TTX (PDB ID: 6A95), the distance between Asp and <sup>O</sup>G<sup>2p49</sup> and mutual disposition of the C-O and O=C bonds suggest that protonated Asp donates an H-bond to G<sup>2p49</sup>. **B.** In the cryo-EM structure of rNav1.5 with flecainide (PDB ID: 3uz0), the distance between oxygens Glu and <sup>O</sup>F<sup>3p49</sup> and mutual disposition of the C-O and O=C bonds suggest that protonated Glu donates an H-bond to <sup>O</sup>F<sup>3p49</sup>. **C.** In the cryo-EM structure of Apo rNav1.5 (PDB ID: 3uz3), the distance between oxygens in Glu and E<sup>2p54</sup> and mutual disposition of the C-O bonds suggests that the two acidic residues share a proton.

**A**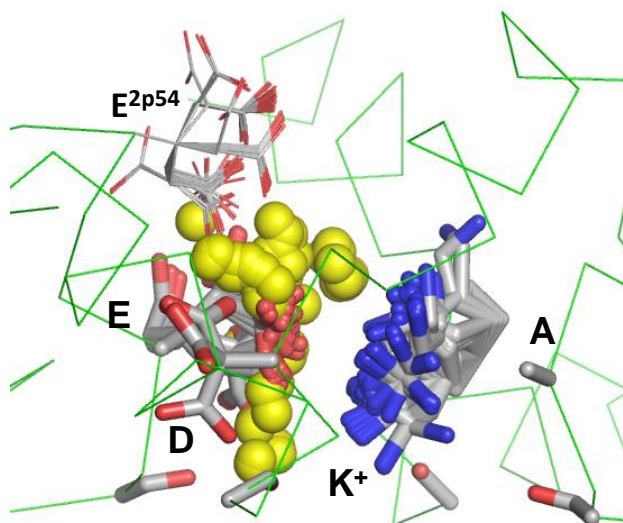**B**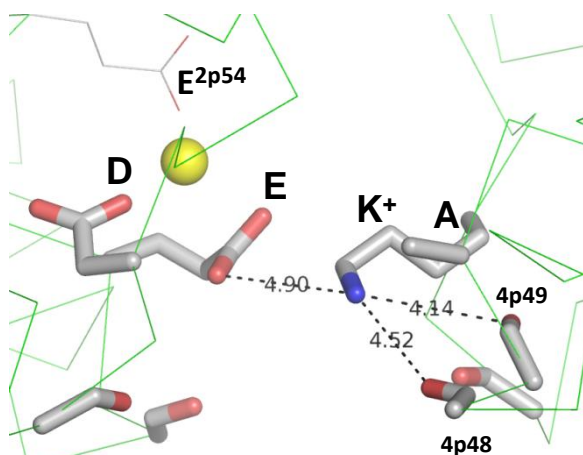**C**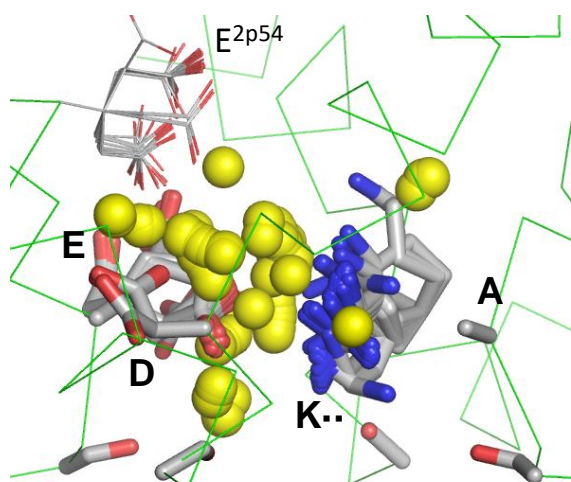**D**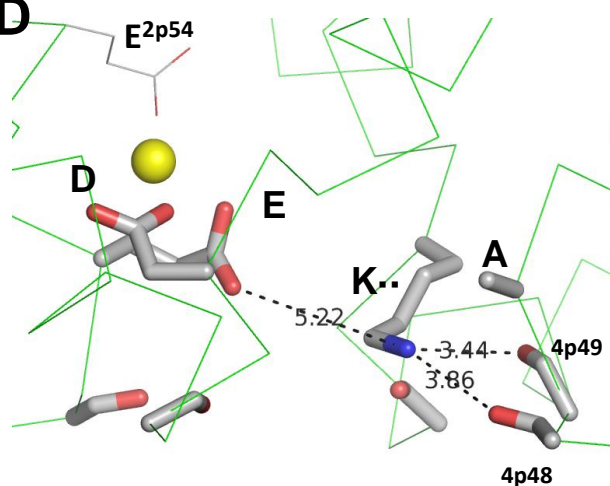

**Figure S2. MC-minimized models of Nav1.4 with Na<sup>+</sup>.** **A.** Ensemble of MECs within 10 kcal/mol from AGM of the Nav1.4 model with Na<sup>+</sup> and Lys<sup>+</sup>. Computations were performed with HotGrid (see Methods). Na<sup>+</sup> is chelated between carboxylates, while Lys<sup>+</sup> and Glu rarely form a salt-bridge. **B.** In the AGM of the ensemble (A), the ammonium group of Lys<sup>+</sup> is at rather large distances from Glu and backbone carbonyls. The salt bridge with Glu is not formed due to repulsion from Na<sup>+</sup>. **C.** Ensemble of MECs within 10 kcal/mol from AGM of the Nav1.4 model with Na<sup>+</sup> and Lys<sup>-</sup>. **D.** AGM of the ensemble (C). See section 3.2 for more detail.

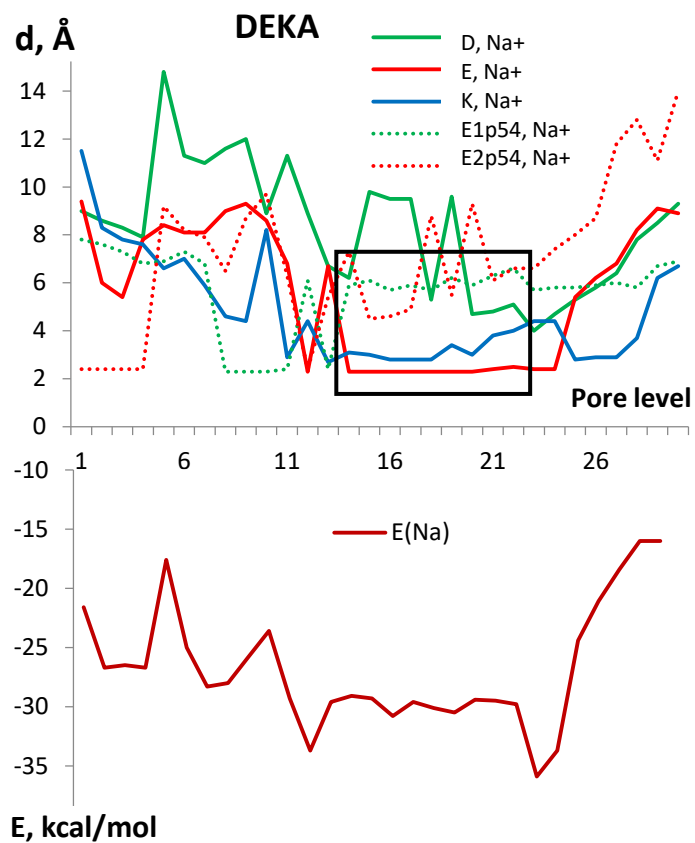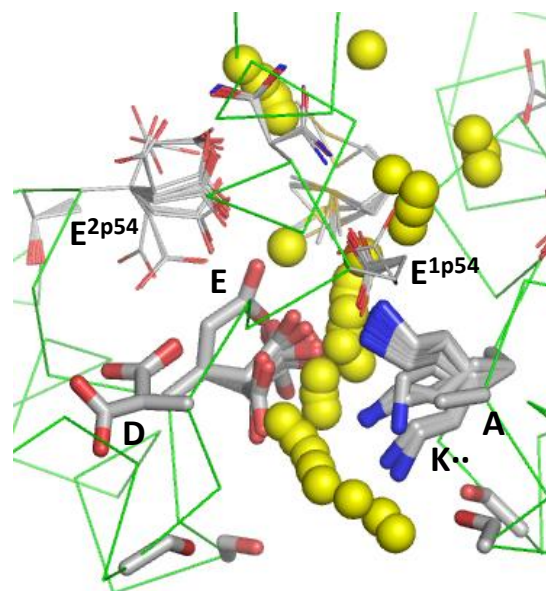

**Figure S3.** Na<sup>+</sup> trajectory computed with dielectric function  $\epsilon=2d_{ij}$ . ( $d_{ij}$  is distance between atoms.) Na<sup>+</sup> is chelated between Lys<sup>··</sup> and Glu<sup>-</sup> at levels 14-18 and 20 of the DEKA region. Lys<sup>··</sup> adopts dunking orientation at levels 26-28 of the 8CO region.



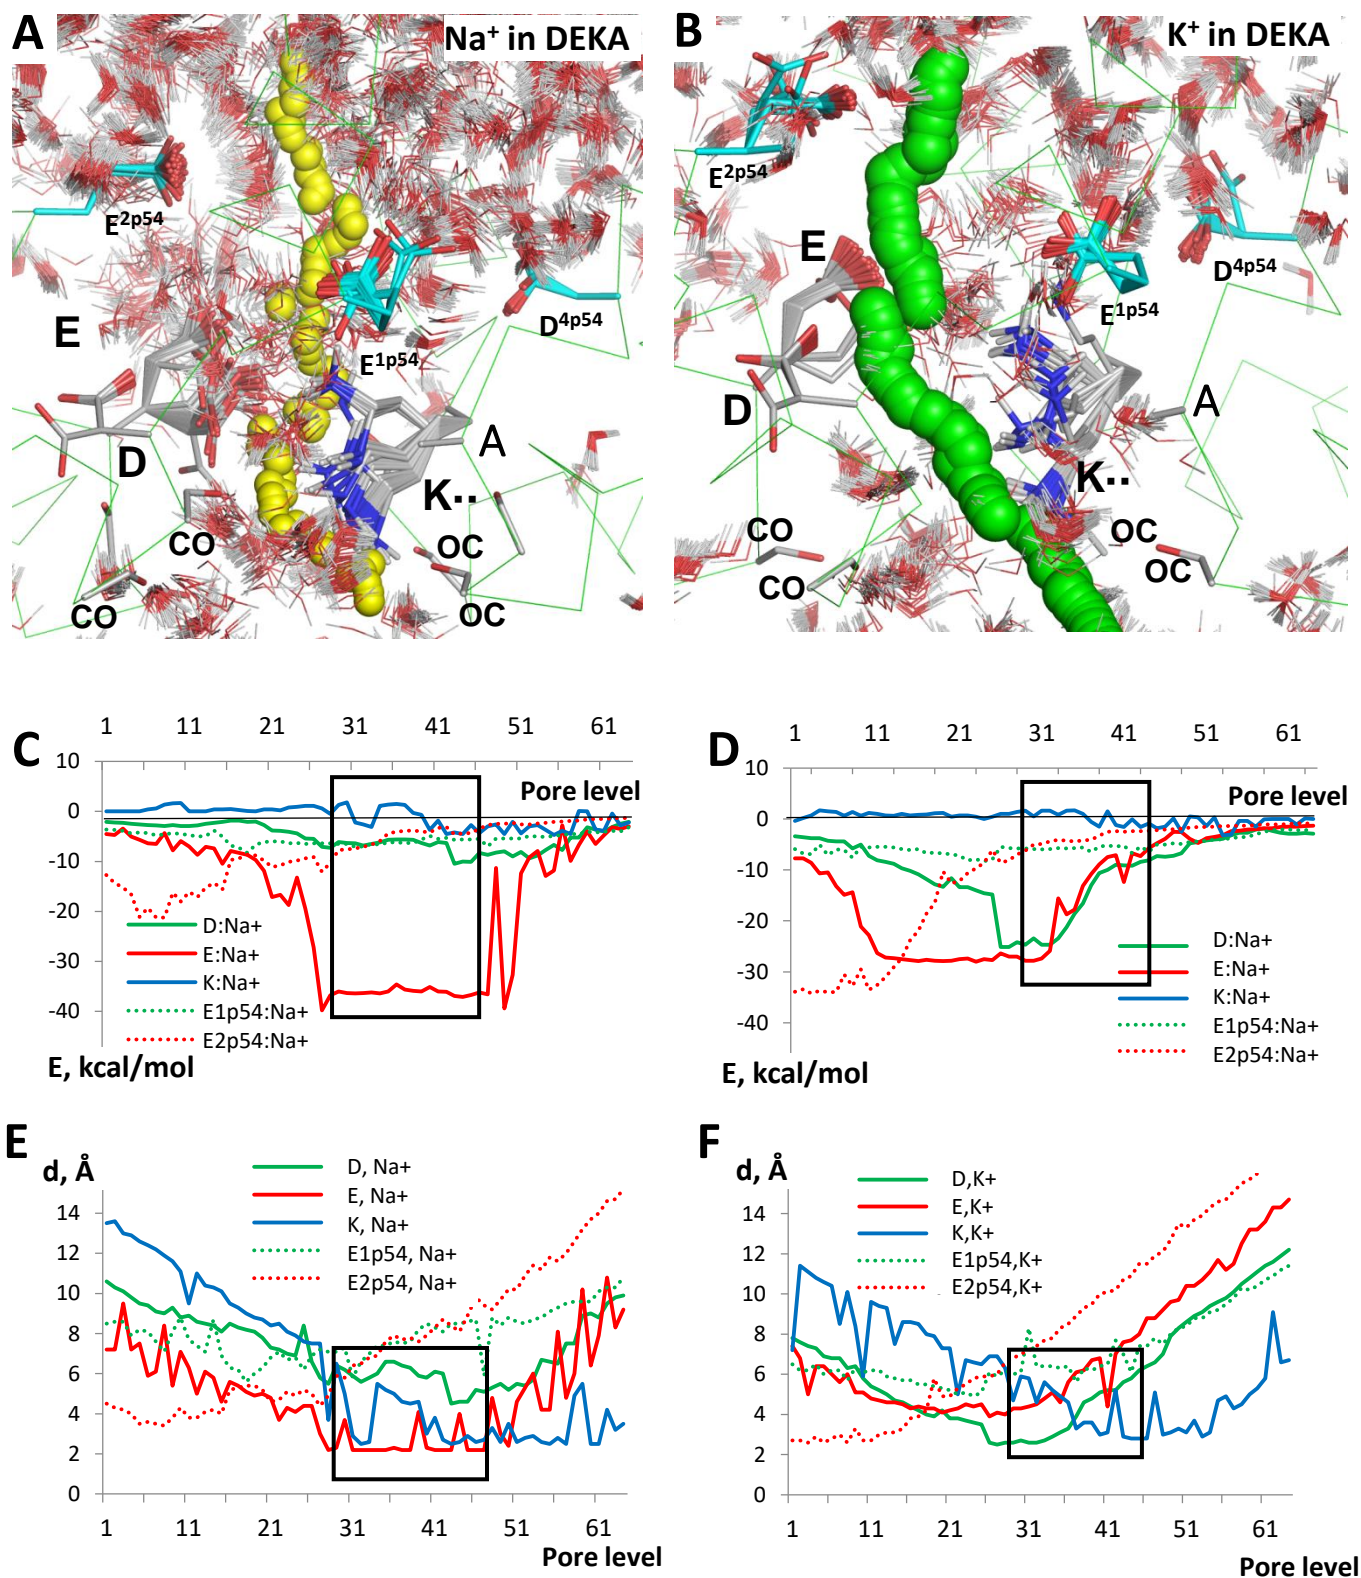

**Figure S4.** Na<sup>+</sup> and K<sup>+</sup> trajectories in Nav1.4 computed with Lys<sup>..</sup>, explicit solvent and the step of 0.25 Å. The DEKA region is boxed. Dielectric function  $\epsilon=d_{ij}$ , was used ( $d_{ij}$  is distance between atoms). For clarity, radii of ions are reduced and carbon atoms of outer carboxylates are cyan

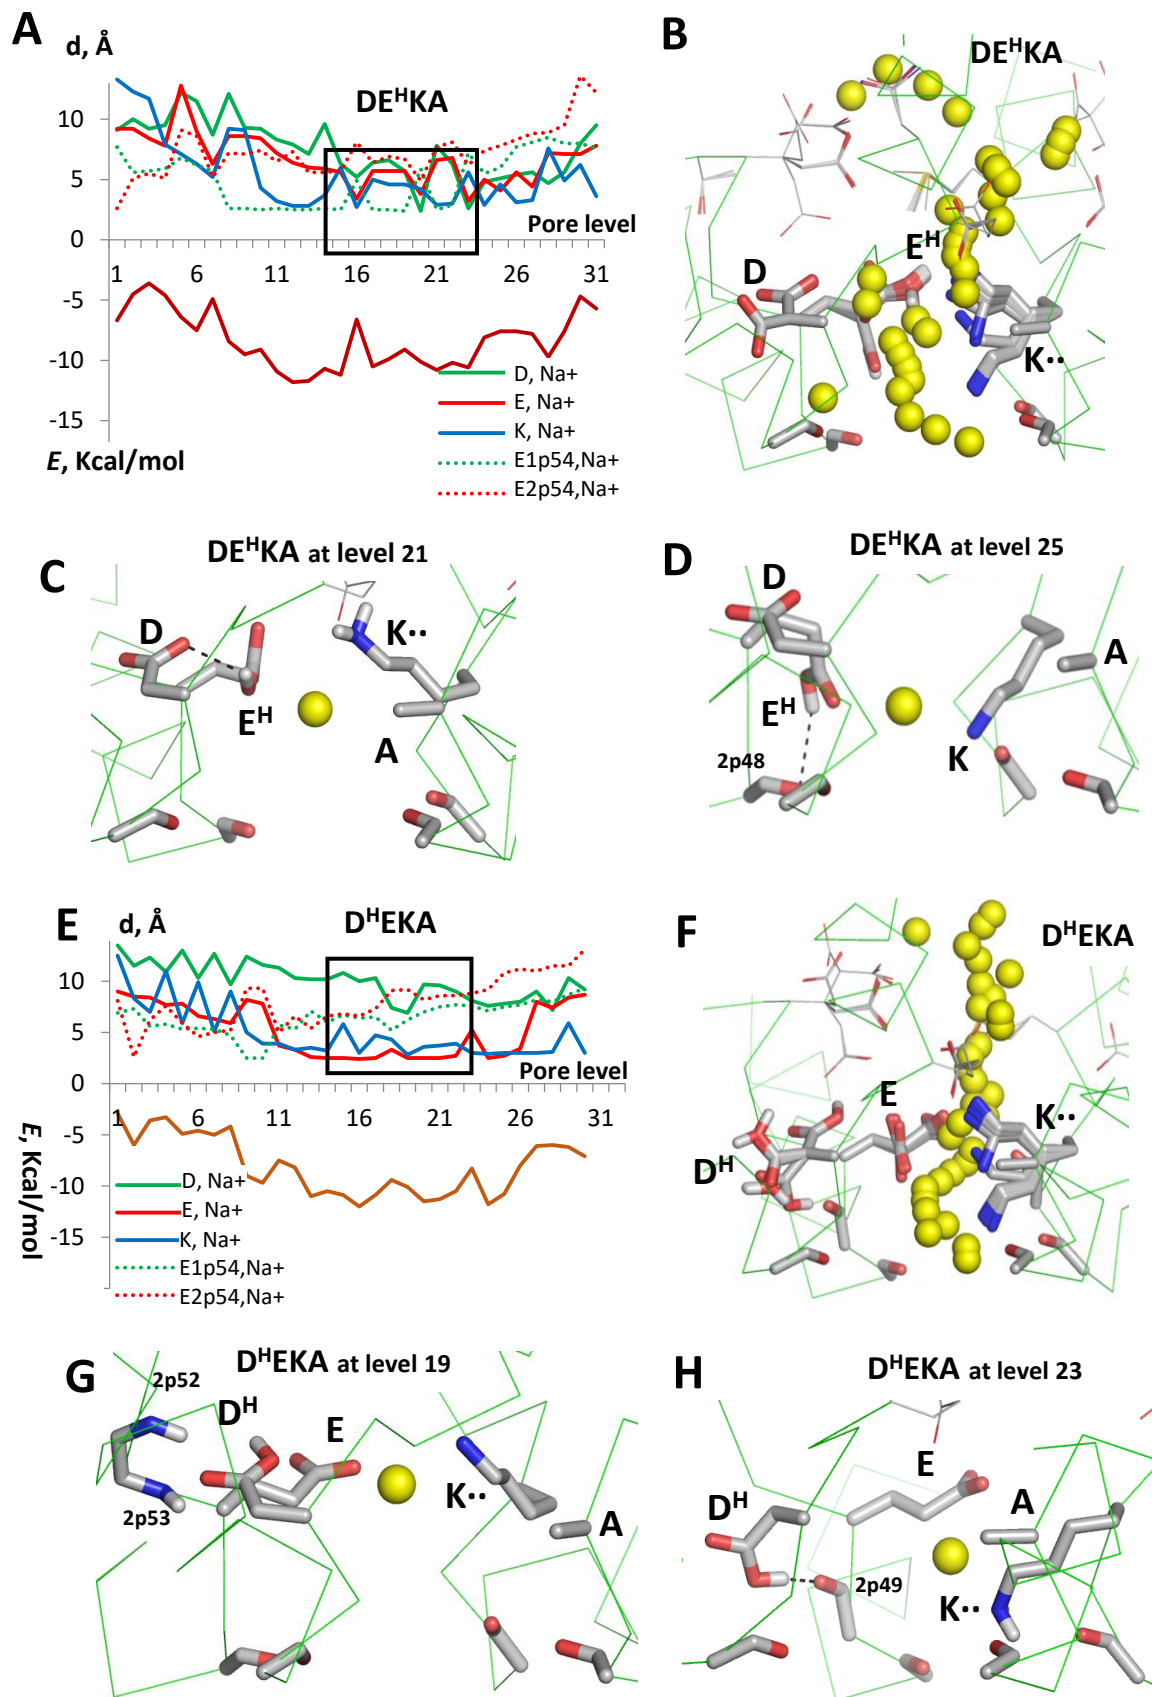

**Figure S5.** Na<sup>+</sup> trajectories in models with Glu<sup>H</sup> (A-D) and Asp<sup>H</sup> (E-H). **A**, Na<sup>+</sup> is chelated by Lys<sup>..</sup> and E1p54 at levels 10-12 and 20, and by Lys<sup>..</sup> and Glu<sup>H</sup> at level 15. **B**, Superposition of AGMs at all steps of the Na<sup>+</sup> trajectory. **C**, At level 22 Glu<sup>H</sup> donates an H-bond to Asp. **D** At level 25 Glu<sup>H</sup> donates an H-bond to <sup>O</sup>C<sup>2p49</sup> and Lys<sup>..</sup> is dunked. **E**, Lys<sup>..</sup> and Glu<sup>H</sup> chelate Na<sup>+</sup> at levels 16 and 24-26. **F**, Superposition of AGMs at all steps of the Na<sup>+</sup> trajectory. **G**, At level 19, Asp<sup>H</sup> accepts H-bonds from backbone amides 2p52 and 2p53. **H**, At level 23, Lys<sup>..</sup> is dunked, while Asp<sup>H</sup> donates an H-bond to G<sup>2p49</sup>. Similar H-bonds are implied in cryo-EM structures of hNav1.7 (Table 2)

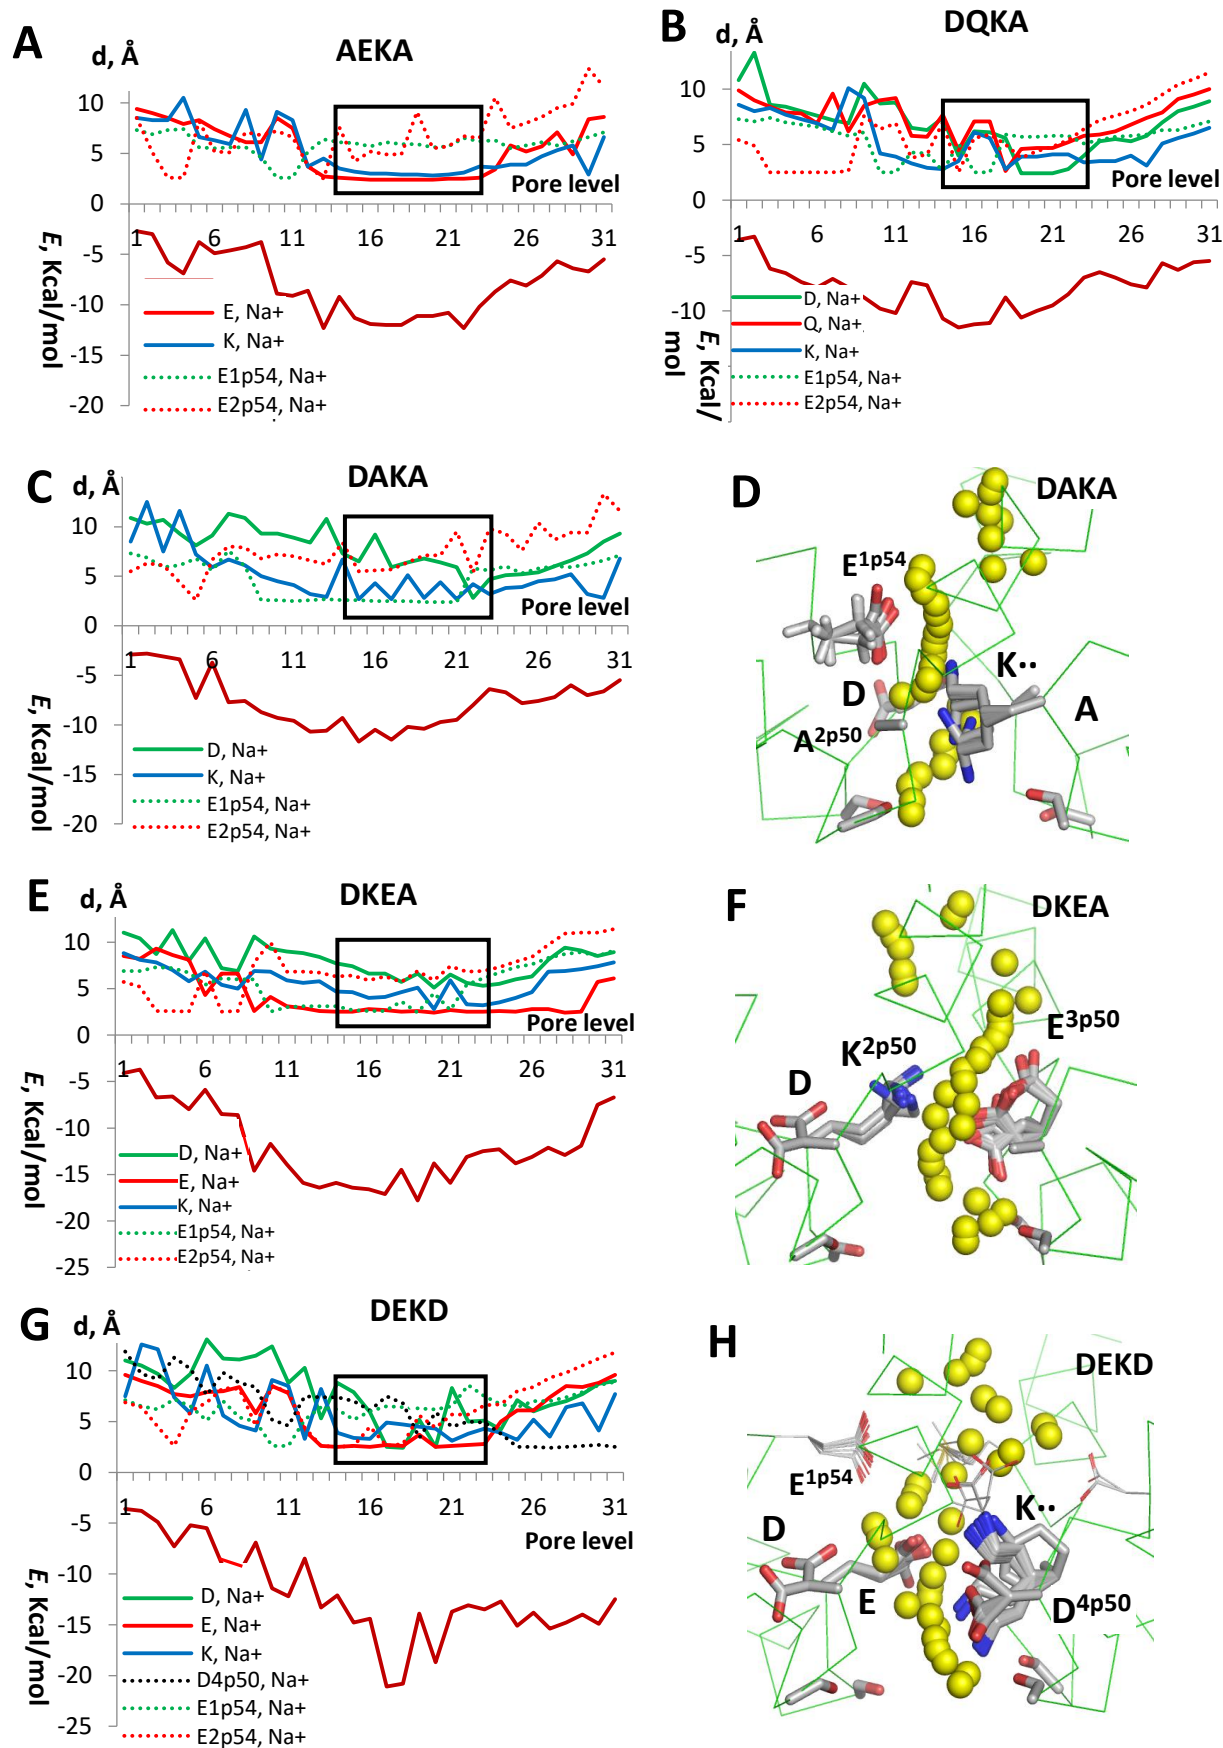

**Figure S6. Na<sup>+</sup> trajectories in DEKA mutants with high or moderate Na/K selectivity. A (AEKA).** Lys<sup>+</sup> and Glu<sup>-</sup> chelate Na<sup>+</sup> at levels 14-21 and Lys<sup>+</sup> dunks at level 30. **B (DQKA).** Lys<sup>+</sup> chelates Na<sup>+</sup> with Q<sup>2p50</sup> at level 18, with E<sup>1p54</sup> or E<sup>2p54</sup> at levels 4 and 15, and dunks at level 27. **C, D (DAKA).** Lys<sup>+</sup> chelates Na<sup>+</sup> with E<sup>1p54</sup> at levels 12, 14, 16, 18 and 20 and dunks at levels 29 and 30. **E, F (DKEA).** Lys<sup>+</sup> in position 2p50 and Glu<sup>-</sup> in position 3p50 chelate Na<sup>+</sup> at levels 20 and 22-24, but Lys<sup>+</sup> in position 2p50 does not dunk. **G, H (DEKD).** Na<sup>+</sup> is chelated by Lys<sup>+</sup> and Glu<sup>-</sup> at levels 13-15, 19 and by Lys<sup>+</sup> and D<sup>4p50</sup> at level 24. Lys<sup>+</sup> dunks at level 30. (See Table 4 for selectivity of the mutants).



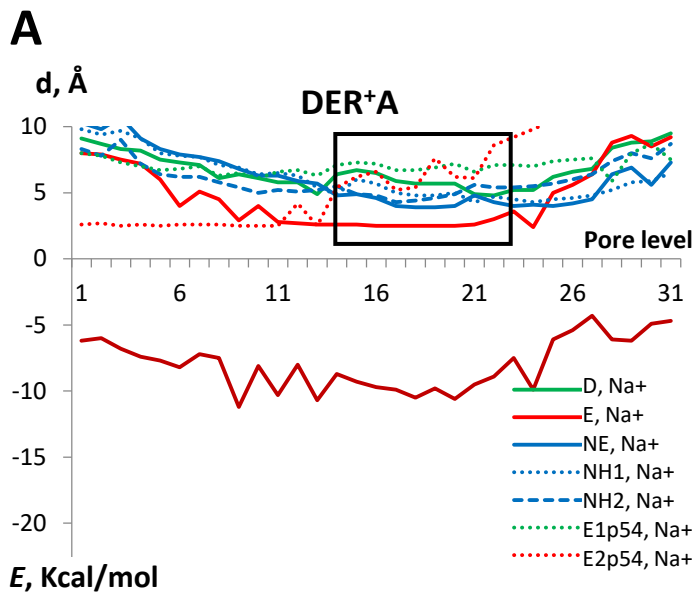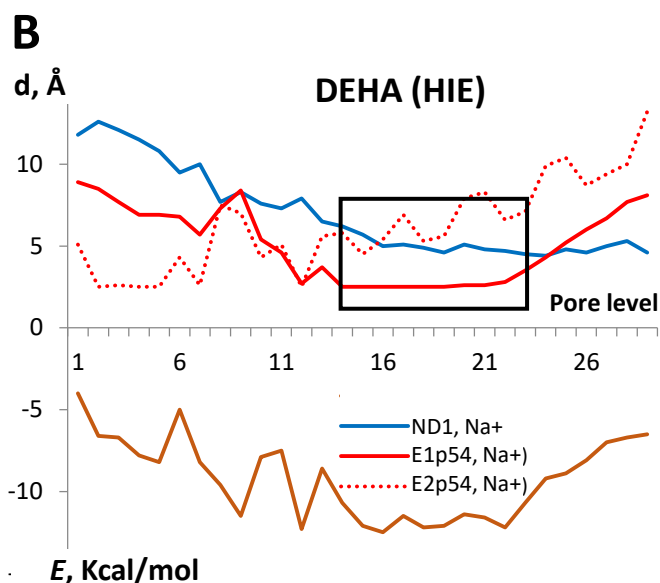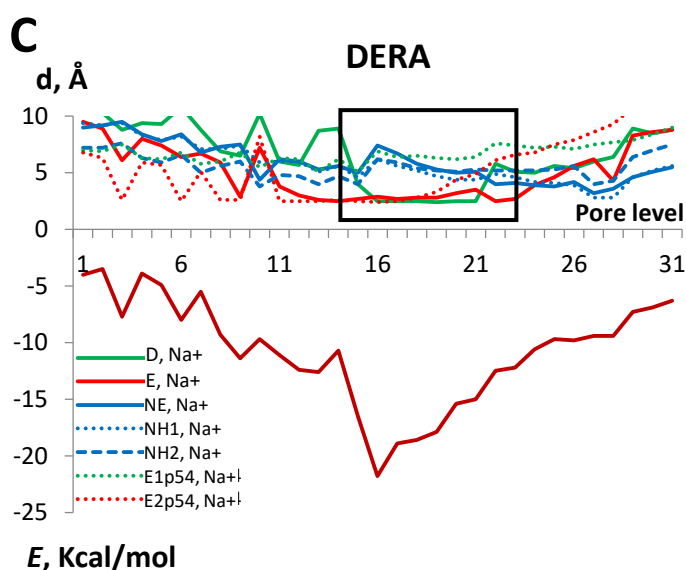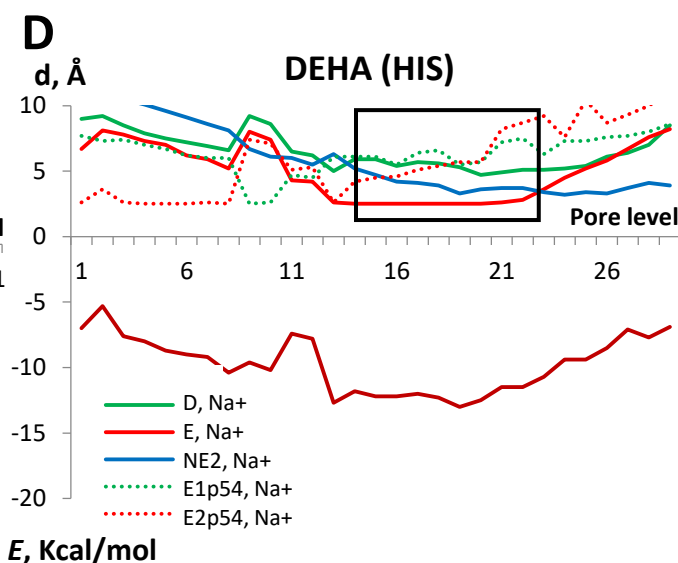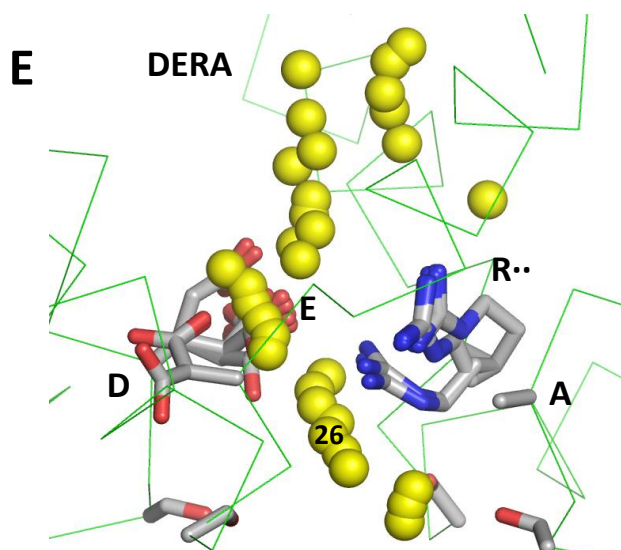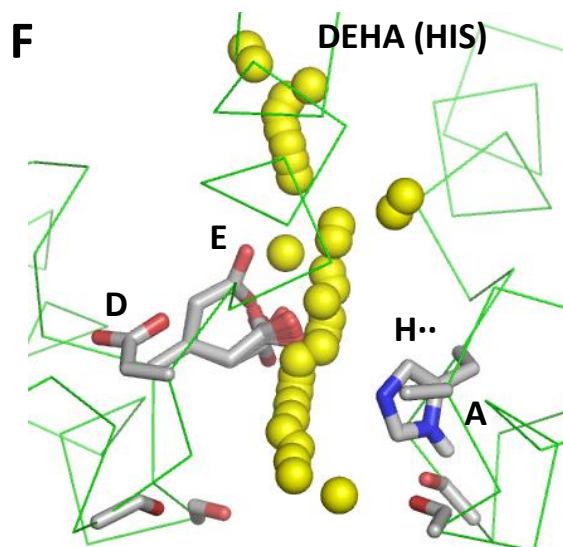

**Figure S7. Na<sup>+</sup> trajectories in the DARA and DAHA models.** In models with protonated (**A**) and deprotonated (**C,E**) arginine, Na<sup>+</sup> does not contact any arginine nitrogen all along the ion trajectory. This can explain the lack of Na<sup>+</sup> selectivity in the DERA mutant (Table 4). **B, D, F.** In the models of two tautomeric forms of neutral histidine, Na<sup>+</sup> does not contact the histidine nitrogen and the DEKA carboxylate simultaneously. This can explain the lack of Na<sup>+</sup> selectivity in the DEHA mutant (Table 4).
